# Supplementary material
Source: PubMed Central journal article supplement (PMC5387001)
Supplement: BPH-174-867-s001.pdf [file BPH-174-867-s001.pdf]

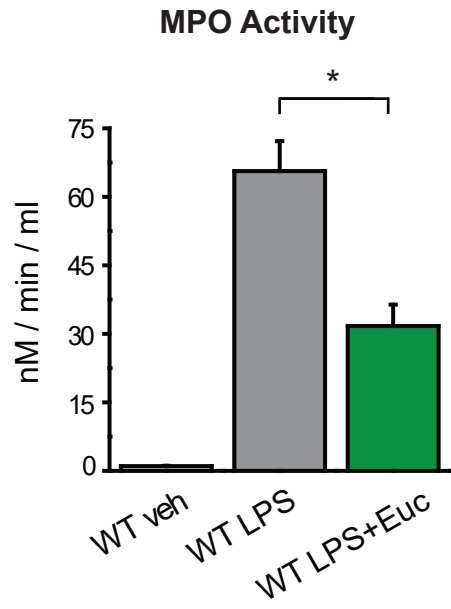

## Supplementary Figure 2

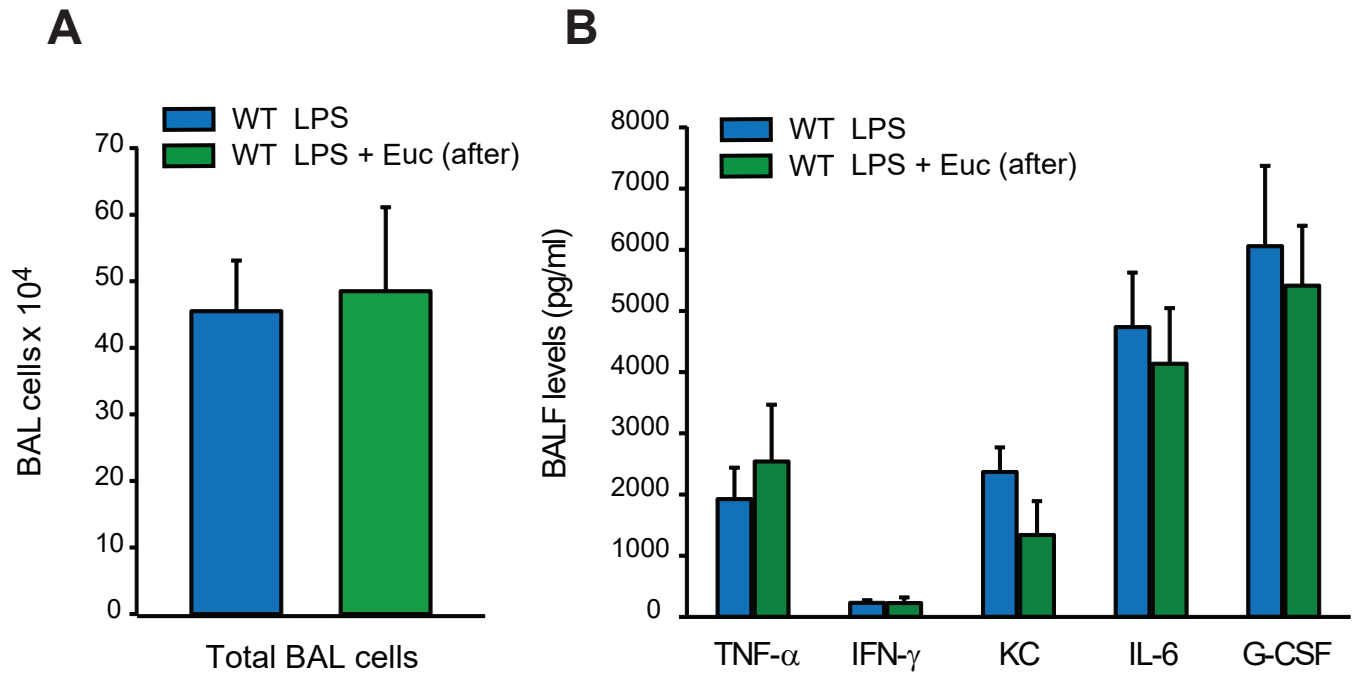

# Supplementary Figure 3

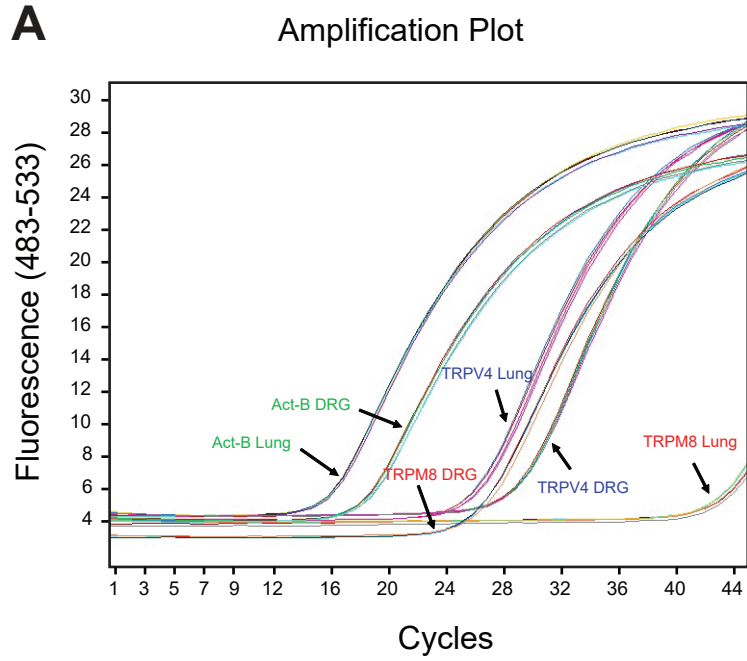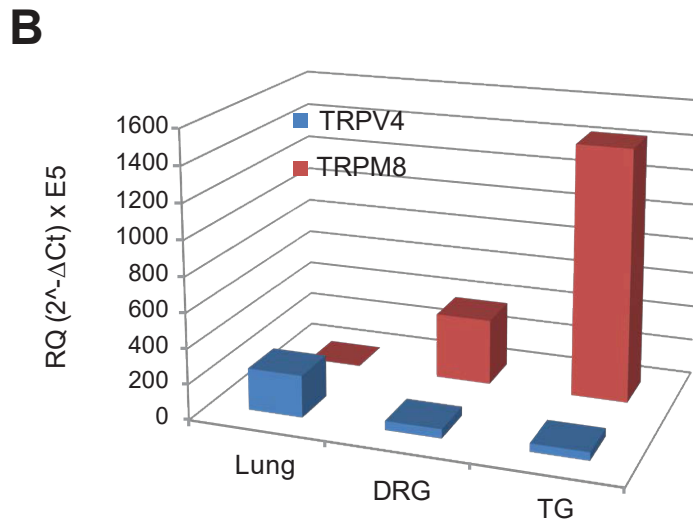

# Supplementary Figure 4

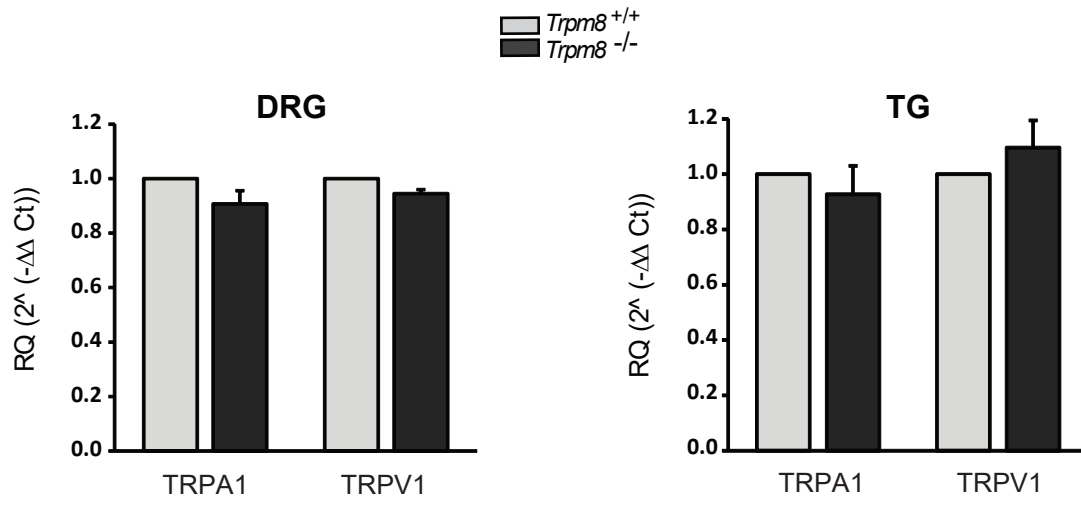

## Supplementary Figure Legends

**Supplementary Figure 1.** Comparison of MPO activity levels in BALF from LPS-exposed mice treated and untreated with eucalyptol. \* $p < 0.05$  (n=4 mice per group)

**Supplementary Figure 2.** Lack of therapeutic effect of eucalyptol when administered after LPS. **(A)** Cell counts in BALF extracted from mice 24 hours after intranasal exposure to LPS. Mice were injected i.p. with eucalyptol (200 mg kg<sup>-1</sup>) 1 hour after the intranasal LPS administration and a second dose was given 6 hours later. (n=4-6 mice per group) **(B)** BALF cytokine levels in the same mice as in (A). None of the differences were significant ( $p > 0.05$ ).

**Supplementary Figure 3.** TRPM8 transcription levels in lung. **(A)** Representative amplification fluorescence curves during RT-PCR showing minimal amplification of TRPM8 transcript cDNA from mouse lung cDNA compared to TRPV4 and to TRPM8 transcript cDNA amplification from DRG and TG cDNA. **(B)** Comparison of TRPM8 transcript cDNA levels in lung, DRG and TG cDNA using TRPV4 as positive control (n=4 mice per group).

**Supplementary Figure 4.** Comparison of transcript levels of TRPA1 and TRPV1 in sensory neurons of wild-type (grey) and *Trpm8*<sup>-/-</sup> mice, by qPCR of cDNAs extracted from dorsal root (DRG, left) or trigeminal (TG, right) ganglia. (n=4 mice per group). None of the data were significantly different ( $p > 0.05$ ).
